# Supplementary material
Source: Research Square preprint supplement (doi:10.21203/rs.3.rs-8328608/v1)
Supplement: Supplementary file 1 [file 914596fcd5586601f7a86e6b.xlsx]

## Sheet: S1
Table S1. Genetic background analysis of Gayal and list of additional cattle samples
#sample	Breed	Sample ID	Group	Clean_reads	mapped_reads	mapping_rate	Average_depth	Coverage_1X	Coverage_4X
AGS1	Angus	SRR1346376	Europe	394537956	390576546	99	14.12	98.75	96.4
AGS2	Angus	SRR1348580	Europe	370724340	365369638	98.56	13.29	98.7	96.15
AGS3	Angus	SRR1348581	Europe	348192896	343751596	98.72	12.53	98.69	95.72
BAN1	Banteng	SRR6448720	Ban	464501092	462203549	99.51	19.55	97.42	95.15
BAN2	Banteng	SRR6448722	Ban	131444134	130578277	99.34	7.34	94.05	67.19
BAN3	Banteng	SRR6448724	Ban	93623130	92949427	99.28	6.82	90.06	45.43
BAN4	Banteng	SRR6448727	Ban	124353684	123807503	99.56	7.16	93.28	65.09
BAN5	Banteng	SRR6448728	Ban	173800814	172408513	99.2	9	94.37	78.5
BAN6	Banteng	SRR6448730	Ban	122119594	120865880	98.97	7.43	92.64	60.71
BAN7	Banteng	SRR28144102	Ban	247520852	244950578	98.96	11.4	96.98	91.62
BAN8	Banteng	SRR28144103	Ban	237918628	235918435	99.16	10.95	96.98	90.62
BAN9	Banteng	SRR28144104	Ban	248186436	246395511	99.28	11.47	97.08	91.42
DLN1	Gayal	DLN1	DLN	643341026	640399934	99.54	30.12	96.44	95.25
DLN10	Gayal	DLN10	DLN	842933286	838464911	99.47	39.73	96.77	95.86
DLN11	Gayal	DLN11	DLN	793314068	787959391	99.33	37.05	96.63	95.68
DLN12	Gayal	DLN12	DLN	951390492	947278972	99.57	42.52	98.23	96.99
DLN13	Gayal	DLN13	DLN	795812468	792358076	99.57	36.44	96.76	95.8
DLN14	Gayal	DLN14	DLN	595721620	593015539	99.55	26.94	96.59	95.33
DLN15	Gayal	DLN15	DLN	934260422	929494542	99.49	43.17	97	96.19
DLN16	Gayal	DLN16	DLN	879037548	874734924	99.51	40.35	98.3	97.03
DLN17	Gayal	DLN17	DLN	950182818	946242391	99.59	42.33	97.47	96.24
DLN18	Gayal	DLN18	DLN	644551992	642256621	99.64	29.6	96.7	95.6
DLN19	Gayal	DLN19	DLN	1155934098	1151243833	99.59	51.5	97.15	96.47
DLN2	Gayal	DLN2	DLN	547686896	545638393	99.63	24.79	97.82	95.9
DLN20	Gayal	DLN20	DLN	692062440	688938298	99.55	32.24	96.8	95.77
DLN21	Gayal	DLN21	DLN	605841402	603858558	99.67	29.41	96.82	95.78
DLN22	Gayal	DLN22	DLN	553622608	551037193	99.53	25.23	96.63	95.28
DLN23	Gayal	DLN23	DLN	804952166	801655134	99.59	36.78	96.72	95.74
DLN24	Gayal	DLN24	DLN	800029282	796055346	99.5	38.17	96.88	96.04
DLN25	Gayal	DLN25	DLN	765745644	761957405	99.51	34.88	96.92	95.97
DLN26	Gayal	DLN26	DLN	864280896	859547450	99.45	38.59	96.82	95.9
DLN27	Gayal	DLN27	DLN	590690682	588168594	99.57	28.14	97.75	96.09
DLN28	Gayal	DLN28	DLN	800040378	796088464	99.51	37.28	98.17	96.86
DLN29	Gayal	DLN29	DLN	627071158	622914175	99.34	28.79	96.68	95.57
DLN3	Gayal	DLN3	DLN	1074520344	1070498621	99.63	47.26	96.9	96.07
DLN30	Gayal	DLN30	DLN	654016866	646832123	98.9	31.23	97.71	96.18
DLN4	Gayal	DLN4	DLN	622425696	620216785	99.65	28.8	96.48	95.22
DLN5	Gayal	DLN5	DLN	1023745186	1018541363	99.49	46.25	96.72	95.85
DLN6	Gayal	DLN6	DLN	555669420	552816948	99.49	25.69	97.81	95.92
DLN7	Gayal	DLN7	DLN	822246464	818068318	99.49	38.29	96.79	95.84
DLN8	Gayal	DLN8	DLN	566631284	564597118	99.64	27.3	96.36	95.03
DLN9	Gayal	DLN9	DLN	534136350	531763949	99.56	24.77	97.9	95.85
GFN1	Guangfeng	SRR5507283	China	249818892	248514033	99.48	12.37	98.14	94.38
GFN2	Guangfeng	SRR5507284	China	201562540	200128358	99.29	10.47	97.83	90.59
GFN3	Guangfeng	SRR5507285	China	220266202	218909847	99.38	11.26	98.03	93.3
GFN4	Guangfeng	SRR5507286	China	204594264	203317278	99.38	10.52	98.06	92.2
GIR1	Gir	SRR2016752	South Asian	403688598	397991425	98.59	14.13	98.05	92.9
GIR2	Gir	SRR2016754	South Asian	318345110	315286419	99.04	11.37	97.65	89.76
HAR1	Hariana	SRR6936539	South Asian	680330384	677263120	99.55	33.93	96.95	96.36
HN1	Hanwoo	SRR934415	East Asian	344258304	343532068	99.79	12.99	98.41	93.74
HN2	Hanwoo	SRR934417	East Asian	337024744	336234693	99.77	12.78	98.41	93.08
HN3	Hanwoo	SRR934418	East Asian	349483786	348763836	99.79	13.12	98.56	94.44
HN4	Hanwoo	SRR934419	East Asian	331664152	330991504	99.8	12.49	98.55	94.28
HN5	Hanwoo	SRR934432	East Asian	359246416	358577220	99.81	13.39	98.73	95.27
NEL1	Nelore	SRR2016762	South Asian	384346614	376253174	97.89	13.54	96.72	93.18
PLM1	Brahman	Brahman05	South Asian	223584606	215818844	96.53	11.69	98.4	93.8
PLM2	Brahman	Brahman06	South Asian	335602830	325288818	96.93	16.94	98.73	96.63
PLM3	Brahman	Brahman07	South Asian	296172516	286516973	96.74	14.83	98.47	95.89
SAH1	Sahiwal	SRR13114524	South Asian	300427080	297982760	99.19	11.12	98.01	91.32
SAH2	Sahiwal	SRR13114535	South Asian	301512592	298747830	99.08	11.25	97.93	92.6
SAH3	Sahiwal	SRR13114546	South Asian	298936446	276859845	92.61	10.42	98	91.71
THA1	Tharparkar	SRR6936538	South Asian	325511544	323500061	99.38	16.57	96.6	95.62
THA2	Tharparkar	SRR13114529	South Asian	303972062	299535210	98.54	11.21	96.48	90.92
THA3	Tharparkar	SRR13114530	South Asian	294137708	291852121	99.22	10.92	96.49	92.85
LQ1	Leiqiong	SRR5507190	China	260293762	256820634	98.67	12.87	98.15	95.02
WN1	Wannan	SRR5507195	China	257440020	254866192	99	12.83	98.21	95.12
WN2	Wannan	SRR6024573	China	276880720	267470744	96.6	12.69	98.15	94.34
WSN1	Wenshan	SRR6024562	China	240124370	238163694	99.18	11.66	97.91	89.25
WSN2	Wenshan	SRR6024569	China	251283538	247811537	98.62	11.5	97.88	89.93
WSN3	Wenshan	SRR6024570	China	256048946	254749604	99.49	11.96	98.45	92.57
WSN4	Wenshan	SRR6024575	China	224988460	223916799	99.52	11.38	96.96	83.51
WSN5	Wenshan	SRR6024576	China	187260926	186388830	99.53	10.02	97.38	85.2
XNTER1	Simmental	SRR1525617	Europe	424002724	417232236	98.4	14.88	98.92	97.07
XNTER2	Simmental	SRR1525700	Europe	415283762	409194892	98.53	14.51	98.87	96.69
XNTER3	Simmental	SRR1525701	Europe	431905192	425099752	98.42	14.51	98.91	96.99
XNTER4	Simmental	SRR1525702	Europe	432749324	428354666	98.98	15.24	98.86	97.03
XNTER5	Simmental	SRR1525703	Europe	528125332	494634304	93.66	17.16	98.97	97.65
XNTER6	Simmental	SRR1525705	Europe	439406152	433075741	98.56	15.51	98.92	97.22
YAK1	Yak	SRR2058046	Yak	492489236	489272889	99.35	16.95	97.32	94.16
YAK2	Yak	SRR2059936	Yak	478856268	475242237	99.25	19.4	97.48	95.09
YAK3	Yak	SRR2059966	Yak	540859792	532490364	98.45	20.18	96.14	94.22
YDDEN1	Mithun	SRR6448575	YDDEN	113967164	111354435	97.71	6.47	91.36	41.79
YDDEN2	Mithun	SRR6448576	YDDEN	148329854	146566771	98.81	6.85	94.59	59.06
YDDEN3	Mithun	SRR6448578	YDDEN	107382148	106693166	99.36	6.57	90.88	36.83
YDDEN4	Mithun	SRR6448579	YDDEN	145962530	144731724	99.16	6.81	94.46	58.68
YDDEN5	Mithun	SRR6448580	YDDEN	169968722	168571235	99.18	7.27	95.39	67.08
YDDEN6	Mithun	SRR6448581	YDDEN	104720654	104048562	99.36	6.59	90.42	35.12
YDDEN7	Mithun	SRR6448582	YDDEN	111585292	110744796	99.25	6.41	91.65	42
YDDEN8	Mithun	SRR6448583	YDDEN	117185140	115716501	98.75	6.5	92.15	44.21
YDDEN9	Mithun	SRR7881467	YDDEN	242792870	238394211	98.19	7	93.92	57.6
YLN1	Yunling	SRR9721710	YLN	103728804	102519613	98.83	6.98	94.59	57.27
YLN2	Yunling	SRR9721735	YLN	117506428	116602619	99.23	7.29	95.24	65.21
YLN3	Yunling	SRR9721767	YLN	121695030	120475584	99	7.32	95.63	68.19
YLN4	Yunling	SRR9721777	YLN	120608590	119782590	99.32	7.26	95.76	69.47
YLN5	Yunling	SRR9721786	YLN	127607786	126509653	99.14	7.41	95.72	70.99
YLN6	Yunling	SRR9721787	YLN	121653332	120503858	99.06	7.59	94.61	62.92
YLN7	Yunling	SRR9721837	YLN	110424692	109295046	98.98	7.32	93.83	57.59
YLN8	Yunling	SRR9721840	YLN	121035786	120017341	99.16	7.35	95.61	67.78
YLN9	Yunling	SRR9721852	YLN	95892382	94778303	98.84	6.84	93.81	50.72

## Sheet: S2
Table S2. The genes corresponding to the SNPs within the candidate interval
GeneID	Gene	Blast_swiss_prot
gene-LOC107133375	--
gene-LOC112447914	--
gene-LOC132343407	--
gene-LOC783574	--
rna-NM_001075516.1	gene=CLDN18	gnl|BL_ORD_ID|65722 sp|Q0VCN0|CLD18_BOVIN Claudin-18 OS=Bos taurus OX=9913 GN=CLDN18 PE=2 SV=1//7.01549e-180
rna-NM_001111262.2	gene=TRIM77	gnl|BL_ORD_ID|479714 sp|I1YAP6|TRI77_HUMAN Tripartite motif-containing protein 77 OS=Homo sapiens OX=9606 GN=TRIM77 PE=2 SV=2//0
rna-NM_001192880.2	gene=NAALAD2	gnl|BL_ORD_ID|262830 sp|Q9Y3Q0|NALD2_HUMAN N-acetylated-alpha-linked acidic dipeptidase 2 OS=Homo sapiens OX=9606 GN=NAALAD2 PE=1 SV=1//0
rna-TRNAC-GCA-190	--
rna-XM_005201865.5	gene=CLDN18	gnl|BL_ORD_ID|65722 sp|Q0VCN0|CLD18_BOVIN Claudin-18 OS=Bos taurus OX=9913 GN=CLDN18 PE=2 SV=1//3.41364e-164
rna-XM_005221493.5	gene=RAB3C	gnl|BL_ORD_ID|337647 sp|P10949|RAB3C_BOVIN Ras-related protein Rab-3C OS=Bos taurus OX=9913 GN=RAB3C PE=2 SV=3//5.06164e-164
rna-XM_005226666.4	gene=NAALAD2	gnl|BL_ORD_ID|262830 sp|Q9Y3Q0|NALD2_HUMAN N-acetylated-alpha-linked acidic dipeptidase 2 OS=Homo sapiens OX=9606 GN=NAALAD2 PE=1 SV=1//0
rna-XM_005226667.4	gene=NAALAD2	gnl|BL_ORD_ID|262830 sp|Q9Y3Q0|NALD2_HUMAN N-acetylated-alpha-linked acidic dipeptidase 2 OS=Homo sapiens OX=9606 GN=NAALAD2 PE=1 SV=1//0
rna-XM_015473118.3	gene=RASGRP1	gnl|BL_ORD_ID|161071 sp|O95267|GRP1_HUMAN RAS guanyl-releasing protein 1 OS=Homo sapiens OX=9606 GN=RASGRP1 PE=1 SV=2//0
rna-XM_024975438.2	gene=API5	gnl|BL_ORD_ID|18864 sp|Q9BZZ5|API5_HUMAN Apoptosis inhibitor 5 OS=Homo sapiens OX=9606 GN=API5 PE=1 SV=3//0
rna-XM_024989910.2	gene=LOC100850659	gnl|BL_ORD_ID|225391 sp|Q01965|LY9_MOUSE T-lymphocyte surface antigen Ly-9 OS=Mus musculus OX=10090 GN=Ly9 PE=1 SV=2//8.76087e-10
rna-XM_024996264.2	gene=DZIP1L	gnl|BL_ORD_ID|110178 sp|Q8IYY4|DZI1L_HUMAN Zinc finger protein DZIP1L OS=Homo sapiens OX=9606 GN=DZIP1L PE=1 SV=2//0
rna-XM_024996266.2	gene=DZIP1L	gnl|BL_ORD_ID|110178 sp|Q8IYY4|DZI1L_HUMAN Zinc finger protein DZIP1L OS=Homo sapiens OX=9606 GN=DZIP1L PE=1 SV=2//0
rna-XM_024996268.2	gene=DZIP1L	gnl|BL_ORD_ID|110178 sp|Q8IYY4|DZI1L_HUMAN Zinc finger protein DZIP1L OS=Homo sapiens OX=9606 GN=DZIP1L PE=1 SV=2//0
rna-XM_059878811.1	gene=PDE4D	gnl|BL_ORD_ID|295985 sp|Q01063|PDE4D_MOUSE cAMP-specific 3&apos;,5&apos;-cyclic phosphodiesterase 4D OS=Mus musculus OX=10090 GN=Pde4d PE=1 SV=2//0
rna-XM_059879270.1	gene=LOC132343336	gnl|BL_ORD_ID|142470 sp|P63126|GAK9_HUMAN Endogenous retrovirus group K member 9 Gag polyprotein OS=Homo sapiens OX=9606 GN=ERVK-9 PE=1 SV=2//2.12152e-18
rna-XR_001501375.3	--
rna-XR_003036957.2	--
rna-XR_003037349.2	--
rna-XR_009490609.1	--
rna-XR_009492104.1	--
rna-XR_009493846.1	--
rna-XR_009496507.1	--
rna-XR_009496519.1	--

## Sheet: S3
Table S3. KEGG enrichment results of Gayal candidate genes overlapped by FST and θπ methods.
##Statistical test method: hypergeometric test / Fisher's exact test
##FDR correction method: Benjamini and Hochberg
#Term	Database	ID	Input number	Background number	P-Value	Corrected P-Value	Input	KEGG_ID/KO	Entrez_ID	Hyperlink
Leukocyte transendothelial migration	KEGG PATHWAY	bta04670	2	119	0.00315469962407	0.0168314743112	rna-NM_001075516.1|rna-XM_005201865.5	bta:511460|bta:511460|	511460|511460|	http://www.genome.jp/kegg-bin/show_pathway?bta04670/bta:511460%09red
Tight junction	KEGG PATHWAY	bta04530	2	132	0.00385159948713	0.0168314743112	rna-NM_001075516.1|rna-XM_005201865.5	bta:511460|bta:511460|	511460|511460|	http://www.genome.jp/kegg-bin/show_pathway?bta04530/bta:511460%09red
Hepatitis C	KEGG PATHWAY	bta05160	2	135	0.00402172091834	0.0168314743112	rna-NM_001075516.1|rna-XM_005201865.5	bta:511460|bta:511460|	511460|511460|	http://www.genome.jp/kegg-bin/show_pathway?bta05160/bta:511460%09red
Cell adhesion molecules (CAMs)	KEGG PATHWAY	bta04514	2	154	0.00517891517267	0.0168314743112	rna-NM_001075516.1|rna-XM_005201865.5	bta:511460|bta:511460|	511460|511460|	http://www.genome.jp/kegg-bin/show_pathway?bta04514/bta:511460%09red
Morphine addiction	KEGG PATHWAY	bta05032	1	93	0.0634865071543	0.133637	rna-XM_059878811.1	bta:539556|	539556|	http://www.genome.jp/kegg-bin/show_pathway?bta05032/bta:539556%09red
T cell receptor signaling pathway	KEGG PATHWAY	bta04660	1	108	0.0732593332858	0.133637	rna-XM_015473118.3	bta:533125|	533125|	http://www.genome.jp/kegg-bin/show_pathway?bta04660/bta:533125%09red
Platelet activation	KEGG PATHWAY	bta04611	1	126	0.0848600263536	0.133637	rna-XM_015473118.3	bta:533125|	533125|	http://www.genome.jp/kegg-bin/show_pathway?bta04611/bta:533125%09red
Ribosome	KEGG PATHWAY	bta03010	1	136	0.0912456590992	0.133637	gene-LOC783574	bta:514966|	514966|	http://www.genome.jp/kegg-bin/show_pathway?bta03010/bta:514966%09red
Ubiquitin mediated proteolysis	KEGG PATHWAY	bta04120	1	138	0.0925177429156	0.133637	gene-LOC132343407	bta:617083|	617083|	http://www.genome.jp/kegg-bin/show_pathway?bta04120/bta:617083%09red
Purine metabolism	KEGG PATHWAY	bta00230	1	176	0.116371	0.151283	rna-XM_059878811.1	bta:539556|	539556|	http://www.genome.jp/kegg-bin/show_pathway?bta00230/bta:539556%09red
cAMP signaling pathway	KEGG PATHWAY	bta04024	1	199	0.130521	0.154252	rna-XM_059878811.1	bta:539556|	539556|	http://www.genome.jp/kegg-bin/show_pathway?bta04024/bta:539556%09red
Ras signaling pathway	KEGG PATHWAY	bta04014	1	234	0.151644	0.164281	rna-XM_015473118.3	bta:533125|	533125|	http://www.genome.jp/kegg-bin/show_pathway?bta04014/bta:533125%09red
MAPK signaling pathway	KEGG PATHWAY	bta04010	1	259	0.166436	0.166436	rna-XM_015473118.3	bta:533125|	533125|	http://www.genome.jp/kegg-bin/show_pathway?bta04010/bta:533125%09red
--------------------
#Term	Database	ID	Input number	Background number	P-Value	Corrected P-Value	Input	KEGG_ID/KO	Entrez_ID	Hyperlink
--------------------
#Term	Database	ID	Input number	Background number	P-Value	Corrected P-Value	Input	KEGG_ID/KO	Entrez_ID	Hyperlink
--------------------

## Sheet: S4
Table S4. GO enrichment results of Gayal candidate genes overlapped by FST and θπ methods.
GO_accession	Description	Term_type	Over_represented_pValue	Corrected_pValue	DEG_item	DEG_list	Bg_item	Bg_list	Gene_names
GO:0004180	carboxypeptidase activity	molecular_function	1.6425e-06	0.017977	3	15	94	60459	rna-XM_005226667.4,rna-NM_001192880.2,rna-XM_005226666.4
GO:0008238	exopeptidase activity	molecular_function	3.2404e-05	0.093282	3	15	254	60459	rna-XM_005226666.4,rna-NM_001192880.2,rna-XM_005226667.4
GO:0005932	microtubule basal body	cellular_component	3.4091e-05	0.093282	3	15	257	60459	rna-XM_024996264.2,rna-XM_024996266.2,rna-XM_024996268.2
GO:0036064	cilium basal body	cellular_component	3.4091e-05	0.093282	3	15	257	60459	rna-XM_024996266.2,rna-XM_024996268.2,rna-XM_024996264.2
GO:0043297	apical junction assembly	biological_process	7.1172e-05	0.12972	2	15	52	60459	rna-XM_005201865.5,rna-NM_001075516.1
GO:0070830	tight junction assembly	biological_process	7.1172e-05	0.12972	2	15	52	60459	rna-XM_005201865.5,rna-NM_001075516.1
GO:0016032	viral process	biological_process	0.00010028	0.12972	2	15	61	60459	rna-XM_059879270.1,rna-XR_009492104.1
GO:0044764	multi-organism cellular process	biological_process	0.00010343	0.12972	2	15	62	60459	rna-XR_009492104.1,rna-XM_059879270.1
GO:0044403	symbiosis, encompassing mutualism through parasitism	biological_process	0.00010666	0.12972	2	15	63	60459	rna-XR_009492104.1,rna-XM_059879270.1
GO:0044419	interspecies interaction between organisms	biological_process	0.00012774	0.13981	2	15	69	60459	rna-XM_059879270.1,rna-XR_009492104.1
GO:0005198	structural molecule activity	molecular_function	0.00025487	0.24992	4	15	1357	60459	rna-XM_059879270.1,rna-XR_009492104.1,rna-XM_005201865.5,rna-NM_001075516.1
GO:0044441	cilium part	cellular_component	0.00027402	0.24992	3	15	523	60459	rna-XM_024996264.2,rna-XM_024996266.2,rna-XM_024996268.2
GO:0005923	tight junction	cellular_component	0.00031874	0.25373	2	15	107	60459	rna-XM_005201865.5,rna-NM_001075516.1
GO:0070160	occluding junction	cellular_component	0.00032455	0.25373	2	15	108	60459	rna-NM_001075516.1,rna-XM_005201865.5
GO:0031514	motile cilium	cellular_component	0.00041437	0.28474	3	15	604	60459	rna-XM_024996268.2,rna-XM_024996266.2,rna-XM_024996264.2
GO:0060271	cilium morphogenesis	biological_process	0.00041625	0.28474	3	15	603	60459	rna-XM_024996268.2,rna-XM_024996266.2,rna-XM_024996264.2
GO:0043296	apical junction complex	cellular_component	0.00089591	0.57681	2	15	178	60459	rna-NM_001075516.1,rna-XM_005201865.5
GO:0007043	cell-cell junction assembly	biological_process	0.0010171	0.61844	2	15	190	60459	rna-XM_005201865.5,rna-NM_001075516.1
GO:0005929	cilium	cellular_component	0.0010768	0.62027	3	15	840	60459	rna-XM_024996268.2,rna-XM_024996266.2,rna-XM_024996264.2
GO:0045216	cell-cell junction organization	biological_process	0.002603	1	2	15	305	60459	rna-XM_005201865.5,rna-NM_001075516.1
GO:0005815	microtubule organizing center	cellular_component	0.0027412	1	3	15	1155	60459	rna-XM_024996264.2,rna-XM_024996268.2,rna-XM_024996266.2
GO:0034329	cell junction assembly	biological_process	0.0027892	1	2	15	315	60459	rna-XM_005201865.5,rna-NM_001075516.1
GO:0044463	cell projection part	cellular_component	0.0037544	1	3	15	1298	60459	rna-XM_024996266.2,rna-XM_024996268.2,rna-XM_024996264.2
GO:0034330	cell junction organization	biological_process	0.0040244	1	2	15	380	60459	rna-NM_001075516.1,rna-XM_005201865.5
GO:0048858	cell projection morphogenesis	biological_process	0.0041549	1	3	15	1337	60459	rna-XM_024996266.2,rna-XM_024996268.2,rna-XM_024996264.2
GO:0032990	cell part morphogenesis	biological_process	0.0041991	1	3	15	1342	60459	rna-XM_024996264.2,rna-XM_024996266.2,rna-XM_024996268.2
GO:0006198	cAMP catabolic process	biological_process	0.0043375	1	1	15	17	60459	rna-XM_059878811.1
GO:0005911	cell-cell junction	cellular_component	0.0045496	1	2	15	409	60459	rna-NM_001075516.1,rna-XM_005201865.5
GO:0051704	multi-organism process	biological_process	0.0057993	1	2	15	480	60459	rna-XM_059879270.1,rna-XR_009492104.1
GO:0070011	peptidase activity, acting on L-amino acid peptides	molecular_function	0.0069495	1	3	15	1631	60459	rna-XM_005226666.4,rna-NM_001192880.2,rna-XM_005226667.4
GO:0008233	peptidase activity	molecular_function	0.0069723	1	3	15	1633	60459	rna-NM_001192880.2,rna-XM_005226666.4,rna-XM_005226667.4
GO:0000902	cell morphogenesis	biological_process	0.0073213	1	3	15	1640	60459	rna-XM_024996264.2,rna-XM_024996266.2,rna-XM_024996268.2
GO:0009214	cyclic nucleotide catabolic process	biological_process	0.00778	1	1	15	31	60459	rna-XM_059878811.1
GO:0043949	regulation of cAMP-mediated signaling	biological_process	0.0080713	1	1	15	32	60459	rna-XM_059878811.1
GO:0043951	negative regulation of cAMP-mediated signaling	biological_process	0.0080713	1	1	15	32	60459	rna-XM_059878811.1
GO:0051117	ATPase binding	molecular_function	0.0083038	1	1	15	33	60459	rna-XM_059878811.1
GO:0032989	cellular component morphogenesis	biological_process	0.0088621	1	3	15	1760	60459	rna-XM_024996264.2,rna-XM_024996268.2,rna-XM_024996266.2
GO:0086003	cardiac muscle cell contraction	biological_process	0.0093405	1	1	15	38	60459	rna-XM_059878811.1
GO:0086004	regulation of cardiac muscle cell contraction	biological_process	0.0093405	1	1	15	38	60459	rna-XM_059878811.1
GO:0009154	purine ribonucleotide catabolic process	biological_process	0.0094992	1	2	15	591	60459	rna-XM_015473118.3,rna-XM_059878811.1
GO:0009261	ribonucleotide catabolic process	biological_process	0.0094992	1	2	15	591	60459	rna-XM_015473118.3,rna-XM_059878811.1
GO:0070252	actin-mediated cell contraction	biological_process	0.0097942	1	1	15	40	60459	rna-XM_059878811.1
GO:0006195	purine nucleotide catabolic process	biological_process	0.010001	1	2	15	608	60459	rna-XM_059878811.1,rna-XM_015473118.3
GO:0072523	purine-containing compound catabolic process	biological_process	0.010431	1	2	15	622	60459	rna-XM_059878811.1,rna-XM_015473118.3
GO:0030030	cell projection organization	biological_process	0.010904	1	3	15	1899	60459	rna-XM_024996268.2,rna-XM_024996266.2,rna-XM_024996264.2
GO:0009166	nucleotide catabolic process	biological_process	0.011261	1	2	15	649	60459	rna-XM_059878811.1,rna-XM_015473118.3
GO:0006904	vesicle docking involved in exocytosis	biological_process	0.011605	1	1	15	47	60459	rna-XM_005221493.5
GO:1901292	nucleoside phosphate catabolic process	biological_process	0.013068	1	2	15	702	60459	rna-XM_059878811.1,rna-XM_015473118.3
GO:0019933	cAMP-mediated signaling	biological_process	0.01354	1	1	15	54	60459	rna-XM_059878811.1
GO:0015630	microtubule cytoskeleton	cellular_component	0.013952	1	3	15	2085	60459	rna-XM_024996266.2,rna-XM_024996268.2,rna-XM_024996264.2
GO:0008270	zinc ion binding	molecular_function	0.015369	1	3	15	2162	60459	rna-XR_009492104.1,rna-XM_059879270.1,rna-NM_001111262.2
GO:0004115	3',5'-cyclic-AMP phosphodiesterase activity	molecular_function	0.01541	1	1	15	61	60459	rna-XM_059878811.1
GO:0046434	organophosphate catabolic process	biological_process	0.015912	1	2	15	780	60459	rna-XM_015473118.3,rna-XM_059878811.1
GO:1901136	carbohydrate derivative catabolic process	biological_process	0.01651	1	2	15	798	60459	rna-XM_059878811.1,rna-XM_015473118.3
GO:0046058	cAMP metabolic process	biological_process	0.019268	1	1	15	77	60459	rna-XM_059878811.1
GO:0009150	purine ribonucleotide metabolic process	biological_process	0.019755	1	2	15	879	60459	rna-XM_059878811.1,rna-XM_015473118.3
GO:0009653	anatomical structure morphogenesis	biological_process	0.020377	1	3	15	2404	60459	rna-XM_024996266.2,rna-XM_024996268.2,rna-XM_024996264.2
GO:0055117	regulation of cardiac muscle contraction	biological_process	0.020601	1	1	15	84	60459	rna-XM_059878811.1
GO:0009259	ribonucleotide metabolic process	biological_process	0.02083	1	2	15	905	60459	rna-XM_059878811.1,rna-XM_015473118.3
GO:0006942	regulation of striated muscle contraction	biological_process	0.021052	1	1	15	86	60459	rna-XM_059878811.1
GO:0019693	ribose phosphate metabolic process	biological_process	0.021633	1	2	15	924	60459	rna-XM_059878811.1,rna-XM_015473118.3
GO:0006163	purine nucleotide metabolic process	biological_process	0.021865	1	2	15	930	60459	rna-XM_015473118.3,rna-XM_059878811.1
GO:0030048	actin filament-based movement	biological_process	0.021866	1	1	15	88	60459	rna-XM_059878811.1
GO:0016787	hydrolase activity	molecular_function	0.024454	1	5	15	7102	60459	rna-XM_005221493.5,rna-XM_005226667.4,rna-XM_059878811.1,rna-XM_005226666.4,rna-NM_001192880.2
GO:0019935	cyclic-nucleotide-mediated signaling	biological_process	0.024534	1	1	15	99	60459	rna-XM_059878811.1
GO:0046914	transition metal ion binding	molecular_function	0.025329	1	3	15	2622	60459	rna-XR_009492104.1,rna-XM_059879270.1,rna-NM_001111262.2
GO:0072521	purine-containing compound metabolic process	biological_process	0.025501	1	2	15	1012	60459	rna-XM_059878811.1,rna-XM_015473118.3
GO:0009306	protein secretion	biological_process	0.026549	1	1	15	109	60459	rna-XM_005221493.5
GO:1901565	organonitrogen compound catabolic process	biological_process	0.02724	1	2	15	1044	60459	rna-XM_015473118.3,rna-XM_059878811.1
GO:0006937	regulation of muscle contraction	biological_process	0.027926	1	1	15	116	60459	rna-XM_059878811.1
GO:0090257	regulation of muscle system process	biological_process	0.027926	1	1	15	116	60459	rna-XM_059878811.1
GO:0004114	3',5'-cyclic-nucleotide phosphodiesterase activity	molecular_function	0.028351	1	1	15	114	60459	rna-XM_059878811.1
GO:0022406	membrane docking	biological_process	0.028589	1	1	15	118	60459	rna-XM_005221493.5
GO:0048278	vesicle docking	biological_process	0.028589	1	1	15	118	60459	rna-XM_005221493.5
GO:0034655	nucleobase-containing compound catabolic process	biological_process	0.028684	1	2	15	1071	60459	rna-XM_059878811.1,rna-XM_015473118.3
GO:0060048	cardiac muscle contraction	biological_process	0.028818	1	1	15	120	60459	rna-XM_059878811.1
GO:0004112	cyclic-nucleotide phosphodiesterase activity	molecular_function	0.029541	1	1	15	119	60459	rna-XM_059878811.1
GO:0030054	cell junction	cellular_component	0.029557	1	2	15	1083	60459	rna-XM_005201865.5,rna-NM_001075516.1
GO:0008016	regulation of heart contraction	biological_process	0.029566	1	1	15	121	60459	rna-XM_059878811.1
GO:0044270	cellular nitrogen compound catabolic process	biological_process	0.031907	1	2	15	1135	60459	rna-XM_059878811.1,rna-XM_015473118.3
GO:0046700	heterocycle catabolic process	biological_process	0.032314	1	2	15	1143	60459	rna-XM_015473118.3,rna-XM_059878811.1
GO:0019439	aromatic compound catabolic process	biological_process	0.03238	1	2	15	1145	60459	rna-XM_015473118.3,rna-XM_059878811.1
GO:0007155	cell adhesion	biological_process	0.032799	1	2	15	1148	60459	rna-NM_001075516.1,rna-XM_005201865.5
GO:0022610	biological adhesion	biological_process	0.032847	1	2	15	1149	60459	rna-NM_001075516.1,rna-XM_005201865.5
GO:0042995	cell projection	cellular_component	0.033877	1	3	15	2918	60459	rna-XM_024996266.2,rna-XM_024996268.2,rna-XM_024996264.2
GO:1901361	organic cyclic compound catabolic process	biological_process	0.034575	1	2	15	1187	60459	rna-XM_015473118.3,rna-XM_059878811.1
GO:0009117	nucleotide metabolic process	biological_process	0.034632	1	2	15	1196	60459	rna-XM_059878811.1,rna-XM_015473118.3
GO:0006941	striated muscle contraction	biological_process	0.035962	1	1	15	150	60459	rna-XM_059878811.1
GO:0009187	cyclic nucleotide metabolic process	biological_process	0.036605	1	1	15	148	60459	rna-XM_059878811.1
GO:0006753	nucleoside phosphate metabolic process	biological_process	0.03813	1	2	15	1261	60459	rna-XM_059878811.1,rna-XM_015473118.3
GO:0046872	metal ion binding	molecular_function	0.038869	1	4	15	5363	60459	rna-NM_001111262.2,rna-XR_009492104.1,rna-XM_015473118.3,rna-XM_059879270.1
GO:0016043	cellular component organization	biological_process	0.038947	1	6	15	10877	60459	rna-XM_024996268.2,rna-XM_005221493.5,rna-XM_024996266.2,rna-XM_005201865.5,rna-NM_001075516.1,rna-XM_024996264.2
GO:0043169	cation binding	molecular_function	0.041501	1	4	15	5475	60459	rna-NM_001111262.2,rna-XM_015473118.3,rna-XM_059879270.1,rna-XR_009492104.1
GO:0060047	heart contraction	biological_process	0.041893	1	1	15	175	60459	rna-XM_059878811.1
GO:0003015	heart process	biological_process	0.042126	1	1	15	176	60459	rna-XM_059878811.1
GO:0044430	cytoskeletal part	cellular_component	0.042471	1	3	15	3199	60459	rna-XM_024996266.2,rna-XM_024996268.2,rna-XM_024996264.2
GO:0055086	nucleobase-containing small molecule metabolic process	biological_process	0.043248	1	2	15	1353	60459	rna-XM_015473118.3,rna-XM_059878811.1
GO:0071840	cellular component organization or biogenesis	biological_process	0.044882	1	6	15	11242	60459	rna-XM_024996268.2,rna-XM_024996266.2,rna-XM_005221493.5,rna-XM_024996264.2,rna-NM_001075516.1,rna-XM_005201865.5
GO:0019932	second-messenger-mediated signaling	biological_process	0.048426	1	1	15	198	60459	rna-XM_059878811.1
GO:0048471	perinuclear region of cytoplasm	cellular_component	0.04974	1	1	15	203	60459	rna-XM_059878811.1
GO:0072659	protein localization to plasma membrane	biological_process	0.051894	1	1	15	213	60459	rna-XM_005221493.5
GO:0017157	regulation of exocytosis	biological_process	0.05218	1	1	15	214	60459	rna-XM_005221493.5
GO:0044325	ion channel binding	molecular_function	0.053594	1	1	15	219	60459	rna-XM_059878811.1
GO:0032879	regulation of localization	biological_process	0.062206	1	2	15	1653	60459	rna-XM_005221493.5,rna-XM_059878811.1
GO:0006936	muscle contraction	biological_process	0.064521	1	1	15	273	60459	rna-XM_059878811.1
GO:0003012	muscle system process	biological_process	0.064973	1	1	15	275	60459	rna-XM_059878811.1
GO:0008015	blood circulation	biological_process	0.066392	1	1	15	280	60459	rna-XM_059878811.1
GO:0003013	circulatory system process	biological_process	0.066619	1	1	15	281	60459	rna-XM_059878811.1
GO:0072657	protein localization to membrane	biological_process	0.067132	1	1	15	277	60459	rna-XM_005221493.5
GO:0043066	negative regulation of apoptotic process	biological_process	0.068657	1	1	15	290	60459	rna-XM_024975438.2
GO:0043069	negative regulation of programmed cell death	biological_process	0.069115	1	1	15	292	60459	rna-XM_024975438.2
GO:0060548	negative regulation of cell death	biological_process	0.069115	1	1	15	292	60459	rna-XM_024975438.2
GO:0008081	phosphoric diester hydrolase activity	molecular_function	0.073964	1	1	15	306	60459	rna-XM_059878811.1
GO:0008021	synaptic vesicle	cellular_component	0.075152	1	1	15	314	60459	rna-XM_005221493.5
GO:0044767	single-organism developmental process	biological_process	0.075673	1	3	15	4052	60459	rna-XM_024996268.2,rna-XM_024996266.2,rna-XM_024996264.2
GO:0005856	cytoskeleton	cellular_component	0.080411	1	3	15	4143	60459	rna-XM_024996264.2,rna-XM_024996266.2,rna-XM_024996268.2
GO:0007009	plasma membrane organization	biological_process	0.080633	1	1	15	336	60459	rna-XM_005221493.5
GO:0005886	plasma membrane	cellular_component	0.081005	1	4	15	6811	60459	rna-XM_005221493.5,rna-XM_015473118.3,rna-XM_005201865.5,rna-NM_001075516.1
GO:0048869	cellular developmental process	biological_process	0.081901	1	3	15	4188	60459	rna-XM_024996266.2,rna-XM_024996268.2,rna-XM_024996264.2
GO:0051046	regulation of secretion	biological_process	0.081939	1	1	15	343	60459	rna-XM_005221493.5
GO:0043547	positive regulation of GTPase activity	biological_process	0.087522	1	1	15	363	60459	rna-XM_015473118.3
GO:0071944	cell periphery	cellular_component	0.098935	1	4	15	7290	60459	rna-XM_005221493.5,rna-XM_015473118.3,rna-NM_001075516.1,rna-XM_005201865.5
GO:1901135	carbohydrate derivative metabolic process	biological_process	0.10211	1	2	15	2211	60459	rna-XM_015473118.3,rna-XM_059878811.1
GO:0060341	regulation of cellular localization	biological_process	0.10482	1	1	15	445	60459	rna-XM_005221493.5
GO:0019637	organophosphate metabolic process	biological_process	0.10667	1	2	15	2264	60459	rna-XM_015473118.3,rna-XM_059878811.1
GO:0060627	regulation of vesicle-mediated transport	biological_process	0.10731	1	1	15	455	60459	rna-XM_005221493.5
GO:0030136	clathrin-coated vesicle	cellular_component	0.10881	1	1	15	461	60459	rna-XM_005221493.5
GO:0051345	positive regulation of hydrolase activity	biological_process	0.113	1	1	15	477	60459	rna-XM_015473118.3
GO:0051270	regulation of cellular component movement	biological_process	0.11769	1	1	15	500	60459	rna-XM_059878811.1
GO:0006887	exocytosis	biological_process	0.11958	1	1	15	509	60459	rna-XM_005221493.5
GO:0033124	regulation of GTP catabolic process	biological_process	0.12864	1	1	15	543	60459	rna-XM_015473118.3
GO:0043087	regulation of GTPase activity	biological_process	0.12864	1	1	15	543	60459	rna-XM_015473118.3
GO:0006184	GTP catabolic process	biological_process	0.13013	1	1	15	550	60459	rna-XM_015473118.3
GO:0009203	ribonucleoside triphosphate catabolic process	biological_process	0.13013	1	1	15	550	60459	rna-XM_015473118.3
GO:0009207	purine ribonucleoside triphosphate catabolic process	biological_process	0.13013	1	1	15	550	60459	rna-XM_015473118.3
GO:1901069	guanosine-containing compound catabolic process	biological_process	0.13013	1	1	15	550	60459	rna-XM_015473118.3
GO:0009118	regulation of nucleoside metabolic process	biological_process	0.1309	1	1	15	554	60459	rna-XM_015473118.3
GO:0030811	regulation of nucleotide catabolic process	biological_process	0.1309	1	1	15	554	60459	rna-XM_015473118.3
GO:0033121	regulation of purine nucleotide catabolic process	biological_process	0.1309	1	1	15	554	60459	rna-XM_015473118.3
GO:0009146	purine nucleoside triphosphate catabolic process	biological_process	0.13143	1	1	15	556	60459	rna-XM_015473118.3
GO:0009143	nucleoside triphosphate catabolic process	biological_process	0.1337	1	1	15	567	60459	rna-XM_015473118.3
GO:0048856	anatomical structure development	biological_process	0.13398	1	3	15	5189	60459	rna-XM_024996266.2,rna-XM_024996268.2,rna-XM_024996264.2
GO:0006152	purine nucleoside catabolic process	biological_process	0.13488	1	1	15	572	60459	rna-XM_015473118.3
GO:0046130	purine ribonucleoside catabolic process	biological_process	0.13488	1	1	15	572	60459	rna-XM_015473118.3
GO:1900542	regulation of purine nucleotide metabolic process	biological_process	0.13647	1	1	15	580	60459	rna-XM_015473118.3
GO:0006140	regulation of nucleotide metabolic process	biological_process	0.1369	1	1	15	582	60459	rna-XM_015473118.3
GO:0009164	nucleoside catabolic process	biological_process	0.13694	1	1	15	582	60459	rna-XM_015473118.3
GO:0042454	ribonucleoside catabolic process	biological_process	0.13694	1	1	15	582	60459	rna-XM_015473118.3
GO:0046039	GTP metabolic process	biological_process	0.138	1	1	15	588	60459	rna-XM_015473118.3
GO:1901658	glycosyl compound catabolic process	biological_process	0.13907	1	1	15	592	60459	rna-XM_015473118.3
GO:1901068	guanosine-containing compound metabolic process	biological_process	0.13989	1	1	15	597	60459	rna-XM_015473118.3
GO:0032970	regulation of actin filament-based process	biological_process	0.14157	1	1	15	607	60459	rna-XM_059878811.1
GO:0044057	regulation of system process	biological_process	0.14182	1	1	15	608	60459	rna-XM_059878811.1
GO:1901564	organonitrogen compound metabolic process	biological_process	0.14478	1	2	15	2738	60459	rna-XM_015473118.3,rna-XM_059878811.1
GO:0009205	purine ribonucleoside triphosphate metabolic process	biological_process	0.14965	1	1	15	646	60459	rna-XM_015473118.3
GO:0030135	coated vesicle	cellular_component	0.15072	1	1	15	653	60459	rna-XM_005221493.5
GO:0009144	purine nucleoside triphosphate metabolic process	biological_process	0.15092	1	1	15	652	60459	rna-XM_015473118.3
GO:0009199	ribonucleoside triphosphate metabolic process	biological_process	0.15177	1	1	15	656	60459	rna-XM_015473118.3
GO:0009141	nucleoside triphosphate metabolic process	biological_process	0.15666	1	1	15	680	60459	rna-XM_015473118.3
GO:0043167	ion binding	molecular_function	0.16777	1	5	15	12089	60459	rna-NM_001111262.2,rna-XR_009492104.1,rna-XM_059879270.1,rna-XM_015473118.3,rna-XM_005221493.5
GO:0007265	Ras protein signal transduction	biological_process	0.17018	1	1	15	736	60459	rna-XM_015473118.3
GO:0046128	purine ribonucleoside metabolic process	biological_process	0.18023	1	1	15	794	60459	rna-XM_015473118.3
GO:0032940	secretion by cell	biological_process	0.18037	1	1	15	794	60459	rna-XM_005221493.5
GO:0042278	purine nucleoside metabolic process	biological_process	0.18125	1	1	15	799	60459	rna-XM_015473118.3
GO:0009968	negative regulation of signal transduction	biological_process	0.18317	1	1	15	805	60459	rna-XM_059878811.1
GO:0003924	GTPase activity	molecular_function	0.1834	1	1	15	816	60459	rna-XM_005221493.5
GO:0023057	negative regulation of signaling	biological_process	0.18443	1	1	15	811	60459	rna-XM_059878811.1
GO:0010648	negative regulation of cell communication	biological_process	0.18443	1	1	15	811	60459	rna-XM_059878811.1
GO:0009119	ribonucleoside metabolic process	biological_process	0.18485	1	1	15	817	60459	rna-XM_015473118.3
GO:0009116	nucleoside metabolic process	biological_process	0.18878	1	1	15	837	60459	rna-XM_015473118.3
GO:0032502	developmental process	biological_process	0.19269	1	3	15	6148	60459	rna-XM_024996264.2,rna-XM_024996266.2,rna-XM_024996268.2
GO:0005768	endosome	cellular_component	0.19313	1	1	15	860	60459	rna-XM_005221493.5
GO:0044281	small molecule metabolic process	biological_process	0.19473	1	2	15	3304	60459	rna-XM_015473118.3,rna-XM_059878811.1
GO:0046903	secretion	biological_process	0.19739	1	1	15	878	60459	rna-XM_005221493.5
GO:1901657	glycosyl compound metabolic process	biological_process	0.20095	1	1	15	899	60459	rna-XM_015473118.3
GO:0043085	positive regulation of catalytic activity	biological_process	0.20104	1	1	15	890	60459	rna-XM_015473118.3
GO:1901575	organic substance catabolic process	biological_process	0.20122	1	2	15	3360	60459	rna-XM_059878811.1,rna-XM_015473118.3
GO:0051336	regulation of hydrolase activity	biological_process	0.205	1	1	15	914	60459	rna-XM_015473118.3
GO:0005525	GTP binding	molecular_function	0.20524	1	1	15	925	60459	rna-XM_005221493.5
GO:0032561	guanyl ribonucleotide binding	molecular_function	0.21	1	1	15	949	60459	rna-XM_005221493.5
GO:0019001	guanyl nucleotide binding	molecular_function	0.21197	1	1	15	959	60459	rna-XM_005221493.5
GO:0031329	regulation of cellular catabolic process	biological_process	0.21373	1	1	15	951	60459	rna-XM_015473118.3
GO:0044248	cellular catabolic process	biological_process	0.21376	1	2	15	3492	60459	rna-XM_015473118.3,rna-XM_059878811.1
GO:0042981	regulation of apoptotic process	biological_process	0.21873	1	1	15	994	60459	rna-XM_024975438.2
GO:0010941	regulation of cell death	biological_process	0.21972	1	1	15	999	60459	rna-XM_024975438.2
GO:0043067	regulation of programmed cell death	biological_process	0.21972	1	1	15	999	60459	rna-XM_024975438.2
GO:0044763	single-organism cellular process	biological_process	0.22452	1	9	15	28372	60459	rna-XM_059878811.1,rna-XM_024996266.2,rna-XM_024996268.2,rna-XM_005221493.5,rna-XM_015473118.3,rna-XM_024996264.2,rna-XM_005201865.5,rna-XM_024975438.2,rna-NM_001075516.1
GO:0043228	non-membrane-bounded organelle	cellular_component	0.22538	1	3	15	6692	60459	rna-XM_024996264.2,rna-XM_024996266.2,rna-XM_024996268.2
GO:0043232	intracellular non-membrane-bounded organelle	cellular_component	0.22538	1	3	15	6692	60459	rna-XM_024996268.2,rna-XM_024996266.2,rna-XM_024996264.2
GO:0005085	guanyl-nucleotide exchange factor activity	molecular_function	0.22768	1	1	15	1011	60459	rna-XM_015473118.3
GO:0048585	negative regulation of response to stimulus	biological_process	0.22972	1	1	15	1037	60459	rna-XM_059878811.1
GO:0044456	synapse part	cellular_component	0.23036	1	1	15	1033	60459	rna-XM_005221493.5
GO:0016023	cytoplasmic membrane-bounded vesicle	cellular_component	0.23264	1	1	15	1057	60459	rna-XM_005221493.5
GO:0009894	regulation of catabolic process	biological_process	0.23439	1	1	15	1056	60459	rna-XM_015473118.3
GO:0051049	regulation of transport	biological_process	0.24122	1	1	15	1103	60459	rna-XM_005221493.5
GO:0022607	cellular component assembly	biological_process	0.24359	1	2	15	3830	60459	rna-XM_005201865.5,rna-NM_001075516.1
GO:0009056	catabolic process	biological_process	0.24396	1	2	15	3821	60459	rna-XM_015473118.3,rna-XM_059878811.1
GO:0035556	intracellular signal transduction	biological_process	0.25137	1	2	15	3866	60459	rna-XM_015473118.3,rna-XM_059878811.1
GO:0044093	positive regulation of molecular function	biological_process	0.25175	1	1	15	1146	60459	rna-XM_015473118.3
GO:0031988	membrane-bounded vesicle	cellular_component	0.25272	1	1	15	1164	60459	rna-XM_005221493.5
GO:0007264	small GTPase mediated signal transduction	biological_process	0.25391	1	1	15	1150	60459	rna-XM_015473118.3
GO:0048523	negative regulation of cellular process	biological_process	0.26024	1	2	15	3973	60459	rna-XM_059878811.1,rna-XM_024975438.2
GO:0031410	cytoplasmic vesicle	cellular_component	0.26306	1	1	15	1216	60459	rna-XM_005221493.5
GO:0016044	cellular membrane organization	biological_process	0.26597	1	1	15	1230	60459	rna-XM_005221493.5
GO:0006915	apoptotic process	biological_process	0.27057	1	1	15	1267	60459	rna-XM_024975438.2
GO:0012501	programmed cell death	biological_process	0.27549	1	1	15	1294	60459	rna-XM_024975438.2
GO:0061024	membrane organization	biological_process	0.27592	1	1	15	1283	60459	rna-XM_005221493.5
GO:0008219	cell death	biological_process	0.27623	1	1	15	1298	60459	rna-XM_024975438.2
GO:0016265	death	biological_process	0.27623	1	1	15	1298	60459	rna-XM_024975438.2
GO:0044085	cellular component biogenesis	biological_process	0.27854	1	2	15	4208	60459	rna-XM_005201865.5,rna-NM_001075516.1
GO:0042578	phosphoric ester hydrolase activity	molecular_function	0.28286	1	1	15	1318	60459	rna-XM_059878811.1
GO:0031982	vesicle	cellular_component	0.30647	1	1	15	1456	60459	rna-XM_005221493.5
GO:0048519	negative regulation of biological process	biological_process	0.30898	1	2	15	4484	60459	rna-XM_059878811.1,rna-XM_024975438.2
GO:0045202	synapse	cellular_component	0.30997	1	1	15	1459	60459	rna-XM_005221493.5
GO:0015031	protein transport	biological_process	0.31293	1	1	15	1497	60459	rna-XM_005221493.5
GO:0045184	establishment of protein localization	biological_process	0.31893	1	1	15	1532	60459	rna-XM_005221493.5
GO:0044699	single-organism process	biological_process	0.3205	1	9	15	30610	60459	rna-XM_059878811.1,rna-XM_015473118.3,rna-XM_005221493.5,rna-XM_024996268.2,rna-XM_024996266.2,rna-XM_005201865.5,rna-XM_024975438.2,rna-NM_001075516.1,rna-XM_024996264.2
GO:0019220	regulation of phosphate metabolic process	biological_process	0.32264	1	1	15	1545	60459	rna-XM_015473118.3
GO:0051174	regulation of phosphorus metabolic process	biological_process	0.32264	1	1	15	1545	60459	rna-XM_015473118.3
GO:0050790	regulation of catalytic activity	biological_process	0.33042	1	1	15	1590	60459	rna-XM_015473118.3
GO:0019899	enzyme binding	molecular_function	0.3368	1	1	15	1617	60459	rna-XM_059878811.1
GO:0030695	GTPase regulator activity	molecular_function	0.34314	1	1	15	1638	60459	rna-XM_015473118.3
GO:0030029	actin filament-based process	biological_process	0.34985	1	1	15	1691	60459	rna-XM_059878811.1
GO:0003824	catalytic activity	molecular_function	0.35117	1	5	15	15780	60459	rna-XM_005221493.5,rna-XM_005226667.4,rna-XM_005226666.4,rna-NM_001192880.2,rna-XM_059878811.1
GO:0005509	calcium ion binding	molecular_function	0.35493	1	1	15	1732	60459	rna-XM_015473118.3
GO:0060589	nucleoside-triphosphatase regulator activity	molecular_function	0.35524	1	1	15	1713	60459	rna-XM_015473118.3
GO:0044710	single-organism metabolic process	biological_process	0.36117	1	2	15	5089	60459	rna-XM_015473118.3,rna-XM_059878811.1
GO:0051239	regulation of multicellular organismal process	biological_process	0.37773	1	1	15	1869	60459	rna-XM_059878811.1
GO:0034613	cellular protein localization	biological_process	0.38981	1	1	15	1955	60459	rna-XM_005221493.5
GO:0070727	cellular macromolecule localization	biological_process	0.38981	1	1	15	1955	60459	rna-XM_005221493.5
GO:0003008	system process	biological_process	0.40086	1	1	15	2044	60459	rna-XM_059878811.1
GO:0065009	regulation of molecular function	biological_process	0.41763	1	1	15	2134	60459	rna-XM_015473118.3
GO:0006928	cellular component movement	biological_process	0.42518	1	1	15	2173	60459	rna-XM_059878811.1
GO:0016788	hydrolase activity, acting on ester bonds	molecular_function	0.43161	1	1	15	2234	60459	rna-XM_059878811.1
GO:0016192	vesicle-mediated transport	biological_process	0.43988	1	1	15	2287	60459	rna-XM_005221493.5
GO:0017111	nucleoside-triphosphatase activity	molecular_function	0.45418	1	1	15	2373	60459	rna-XM_005221493.5
GO:0008104	protein localization	biological_process	0.46133	1	1	15	2435	60459	rna-XM_005221493.5
GO:0006796	phosphate-containing compound metabolic process	biological_process	0.46898	1	2	15	6224	60459	rna-XM_059878811.1,rna-XM_015473118.3
GO:0016462	pyrophosphatase activity	molecular_function	0.47289	1	1	15	2510	60459	rna-XM_005221493.5
GO:0016817	hydrolase activity, acting on acid anhydrides	molecular_function	0.47482	1	1	15	2525	60459	rna-XM_005221493.5
GO:0016818	hydrolase activity, acting on acid anhydrides, in phosphorus-containing anhydrides	molecular_function	0.47482	1	1	15	2525	60459	rna-XM_005221493.5
GO:0003676	nucleic acid binding	molecular_function	0.47619	1	3	15	10165	60459	rna-XM_024975438.2,rna-XR_009492104.1,rna-XM_059879270.1
GO:0006793	phosphorus metabolic process	biological_process	0.4765	1	2	15	6311	60459	rna-XM_059878811.1,rna-XM_015473118.3
GO:0043231	intracellular membrane-bounded organelle	cellular_component	0.48572	1	6	15	22129	60459	rna-XM_024996266.2,rna-XM_024996268.2,rna-XM_005221493.5,rna-XM_024975438.2,rna-XM_024996264.2,rna-XM_059878811.1
GO:0043227	membrane-bounded organelle	cellular_component	0.49154	1	6	15	22238	60459	rna-XM_024996264.2,rna-XM_024975438.2,rna-XM_024996266.2,rna-XM_024996268.2,rna-XM_005221493.5,rna-XM_059878811.1
GO:0009966	regulation of signal transduction	biological_process	0.49743	1	1	15	2703	60459	rna-XM_059878811.1
GO:0030234	enzyme regulator activity	molecular_function	0.50707	1	1	15	2772	60459	rna-XM_015473118.3
GO:0071702	organic substance transport	biological_process	0.51885	1	1	15	2878	60459	rna-XM_005221493.5
GO:0033036	macromolecule localization	biological_process	0.54457	1	1	15	3082	60459	rna-XM_005221493.5
GO:0005829	cytosol	cellular_component	0.54534	1	1	15	3109	60459	rna-XM_059878811.1
GO:0005737	cytoplasm	cellular_component	0.54632	1	5	15	19313	60459	rna-XM_024996268.2,rna-XM_005221493.5,rna-XM_024996266.2,rna-XM_024996264.2,rna-XM_059878811.1
GO:0010646	regulation of cell communication	biological_process	0.55816	1	1	15	3191	60459	rna-XM_059878811.1
GO:0023051	regulation of signaling	biological_process	0.55937	1	1	15	3201	60459	rna-XM_059878811.1
GO:0003723	RNA binding	molecular_function	0.56268	1	1	15	3249	60459	rna-XM_024975438.2
GO:1901363	heterocyclic compound binding	molecular_function	0.58175	1	4	15	15771	60459	rna-XM_005221493.5,rna-XM_059879270.1,rna-XR_009492104.1,rna-XM_024975438.2
GO:0051649	establishment of localization in cell	biological_process	0.58343	1	1	15	3429	60459	rna-XM_005221493.5
GO:0016020	membrane	cellular_component	0.58643	1	4	15	15992	60459	rna-NM_001075516.1,rna-XM_005201865.5,rna-XM_005221493.5,rna-XM_015473118.3
GO:0097159	organic cyclic compound binding	molecular_function	0.59563	1	4	15	16015	60459	rna-XR_009492104.1,rna-XM_024975438.2,rna-XM_005221493.5,rna-XM_059879270.1
GO:0048583	regulation of response to stimulus	biological_process	0.60773	1	1	15	3651	60459	rna-XM_059878811.1
GO:0044446	intracellular organelle part	cellular_component	0.60862	1	3	15	12261	60459	rna-XM_024996268.2,rna-XM_024996266.2,rna-XM_024996264.2
GO:0044422	organelle part	cellular_component	0.62611	1	3	15	12549	60459	rna-XM_024996264.2,rna-XM_024996266.2,rna-XM_024996268.2
GO:0009987	cellular process	biological_process	0.63854	1	11	15	44513	60459	rna-XR_009492104.1,rna-XM_024996268.2,rna-XM_005221493.5,rna-XM_024996266.2,rna-XM_015473118.3,rna-XM_059878811.1,rna-XM_024996264.2,rna-NM_001075516.1,rna-XM_005201865.5,rna-XM_024975438.2,rna-XM_059879270.1
GO:0051641	cellular localization	biological_process	0.65757	1	1	15	4163	60459	rna-XM_005221493.5
GO:0043229	intracellular organelle	cellular_component	0.69916	1	6	15	26335	60459	rna-XM_024996266.2,rna-XM_024996268.2,rna-XM_005221493.5,rna-XM_024996264.2,rna-XM_024975438.2,rna-XM_059878811.1
GO:0051179	localization	biological_process	0.69974	1	2	15	9339	60459	rna-XM_059878811.1,rna-XM_005221493.5
GO:0043226	organelle	cellular_component	0.7044	1	6	15	26452	60459	rna-XM_024996268.2,rna-XM_005221493.5,rna-XM_024996266.2,rna-XM_024996264.2,rna-XM_024975438.2,rna-XM_059878811.1
GO:0005623	cell	cellular_component	0.73248	1	9	15	38822	60459	rna-XM_024996264.2,rna-NM_001075516.1,rna-XM_024975438.2,rna-XM_005201865.5,rna-XM_059878811.1,rna-XM_024996268.2,rna-XM_024996266.2,rna-XM_005221493.5,rna-XM_015473118.3
GO:0044464	cell part	cellular_component	0.73248	1	9	15	38822	60459	rna-XM_005201865.5,rna-NM_001075516.1,rna-XM_024975438.2,rna-XM_024996264.2,rna-XM_059878811.1,rna-XM_015473118.3,rna-XM_024996266.2,rna-XM_024996268.2,rna-XM_005221493.5
GO:0003674	molecular_function	molecular_function	0.75296	1	12	15	50115	60459	rna-NM_001111262.2,rna-NM_001192880.2,rna-XM_005201865.5,rna-XM_024975438.2,rna-NM_001075516.1,rna-XM_059879270.1,rna-XM_059878811.1,rna-XM_005226666.4,rna-XR_009492104.1,rna-XM_005226667.4,rna-XM_005221493.5,rna-XM_015473118.3
GO:0007165	signal transduction	biological_process	0.7565	1	2	15	10419	60459	rna-XM_015473118.3,rna-XM_059878811.1
GO:0035639	purine ribonucleoside triphosphate binding	molecular_function	0.76183	1	1	15	5452	60459	rna-XM_005221493.5
GO:0001883	purine nucleoside binding	molecular_function	0.76249	1	1	15	5462	60459	rna-XM_005221493.5
GO:0032550	purine ribonucleoside binding	molecular_function	0.76249	1	1	15	5462	60459	rna-XM_005221493.5
GO:0001882	nucleoside binding	molecular_function	0.76282	1	1	15	5467	60459	rna-XM_005221493.5
GO:0032549	ribonucleoside binding	molecular_function	0.76282	1	1	15	5467	60459	rna-XM_005221493.5
GO:0032555	purine ribonucleotide binding	molecular_function	0.76478	1	1	15	5498	60459	rna-XM_005221493.5
GO:0017076	purine nucleotide binding	molecular_function	0.76663	1	1	15	5527	60459	rna-XM_005221493.5
GO:0032553	ribonucleotide binding	molecular_function	0.76733	1	1	15	5538	60459	rna-XM_005221493.5
GO:0000166	nucleotide binding	molecular_function	0.79603	1	1	15	6019	60459	rna-XM_005221493.5
GO:1901265	nucleoside phosphate binding	molecular_function	0.79603	1	1	15	6019	60459	rna-XM_005221493.5
GO:0044700	single organism signaling	biological_process	0.8094	1	2	15	11533	60459	rna-XM_059878811.1,rna-XM_015473118.3
GO:0023052	signaling	biological_process	0.81146	1	2	15	11581	60459	rna-XM_015473118.3,rna-XM_059878811.1
GO:0044765	single-organism transport	biological_process	0.8147	1	1	15	6413	60459	rna-XM_005221493.5
GO:0036094	small molecule binding	molecular_function	0.81865	1	1	15	6445	60459	rna-XM_005221493.5
GO:0007154	cell communication	biological_process	0.81887	1	2	15	11760	60459	rna-XM_015473118.3,rna-XM_059878811.1
GO:0044707	single-multicellular organism process	biological_process	0.83024	1	1	15	6729	60459	rna-XM_059878811.1
GO:0008150	biological_process	biological_process	0.83636	1	11	15	48451	60459	rna-XM_024996264.2,rna-XM_005201865.5,rna-NM_001075516.1,rna-XM_024975438.2,rna-XM_059879270.1,rna-XM_059878811.1,rna-XR_009492104.1,rna-XM_024996266.2,rna-XM_024996268.2,rna-XM_005221493.5,rna-XM_015473118.3
GO:0051716	cellular response to stimulus	biological_process	0.8415	1	2	15	12364	60459	rna-XM_059878811.1,rna-XM_015473118.3
GO:0032501	multicellular organismal process	biological_process	0.84378	1	1	15	7033	60459	rna-XM_059878811.1
GO:0044444	cytoplasmic part	cellular_component	0.84848	1	2	15	12597	60459	rna-XM_059878811.1,rna-XM_005221493.5
GO:0006810	transport	biological_process	0.85414	1	1	15	7267	60459	rna-XM_005221493.5
GO:0051234	establishment of localization	biological_process	0.86011	1	1	15	7414	60459	rna-XM_005221493.5
GO:0043168	anion binding	molecular_function	0.86325	1	1	15	7445	60459	rna-XM_005221493.5
GO:0005634	nucleus	cellular_component	0.88594	1	2	15	13678	60459	rna-XM_059878811.1,rna-XM_024975438.2
GO:0050794	regulation of cellular process	biological_process	0.88641	1	4	15	23149	60459	rna-XM_059878811.1,rna-XM_005221493.5,rna-XM_015473118.3,rna-XM_024975438.2
GO:0050896	response to stimulus	biological_process	0.88866	1	2	15	13868	60459	rna-XM_015473118.3,rna-XM_059878811.1
GO:0006139	nucleobase-containing compound metabolic process	biological_process	0.89879	1	2	15	14146	60459	rna-XM_059878811.1,rna-XM_015473118.3
GO:0006725	cellular aromatic compound metabolic process	biological_process	0.90388	1	2	15	14357	60459	rna-XM_059878811.1,rna-XM_015473118.3
GO:0046483	heterocycle metabolic process	biological_process	0.90459	1	2	15	14386	60459	rna-XM_015473118.3,rna-XM_059878811.1
GO:1901360	organic cyclic compound metabolic process	biological_process	0.91056	1	2	15	14647	60459	rna-XM_015473118.3,rna-XM_059878811.1
GO:0050789	regulation of biological process	biological_process	0.91444	1	4	15	24404	60459	rna-XM_015473118.3,rna-XM_005221493.5,rna-XM_024975438.2,rna-XM_059878811.1
GO:0034641	cellular nitrogen compound metabolic process	biological_process	0.91464	1	2	15	14831	60459	rna-XM_059878811.1,rna-XM_015473118.3
GO:0005488	binding	molecular_function	0.91801	1	7	15	36740	60459	rna-XM_059878811.1,rna-NM_001111262.2,rna-XR_009492104.1,rna-XM_024975438.2,rna-XM_059879270.1,rna-XM_015473118.3,rna-XM_005221493.5
GO:0044424	intracellular part	cellular_component	0.92144	1	6	15	33216	60459	rna-XM_059878811.1,rna-XM_024975438.2,rna-XM_024996264.2,rna-XM_024996268.2,rna-XM_005221493.5,rna-XM_024996266.2
GO:0005622	intracellular	cellular_component	0.92269	1	6	15	33281	60459	rna-XM_059878811.1,rna-XM_024996268.2,rna-XM_024996266.2,rna-XM_005221493.5,rna-XM_024975438.2,rna-XM_024996264.2
GO:0019219	regulation of nucleobase-containing compound metabolic process	biological_process	0.92993	1	1	15	9730	60459	rna-XM_015473118.3
GO:0006807	nitrogen compound metabolic process	biological_process	0.9301	1	2	15	15610	60459	rna-XM_015473118.3,rna-XM_059878811.1
GO:0051171	regulation of nitrogen compound metabolic process	biological_process	0.93084	1	1	15	9775	60459	rna-XM_015473118.3
GO:0065007	biological regulation	biological_process	0.94024	1	4	15	25873	60459	rna-XM_059878811.1,rna-XM_024975438.2,rna-XM_015473118.3,rna-XM_005221493.5
GO:0005575	cellular_component	cellular_component	0.94076	1	9	15	45349	60459	rna-XM_059878811.1,rna-XM_015473118.3,rna-XM_005221493.5,rna-XM_024996268.2,rna-XM_024996266.2,rna-XM_024975438.2,rna-XM_005201865.5,rna-NM_001075516.1,rna-XM_024996264.2
GO:0080090	regulation of primary metabolic process	biological_process	0.95486	1	1	15	11202	60459	rna-XM_015473118.3
GO:0031323	regulation of cellular metabolic process	biological_process	0.95845	1	1	15	11471	60459	rna-XM_015473118.3
GO:0019222	regulation of metabolic process	biological_process	0.97007	1	1	15	12531	60459	rna-XM_015473118.3
GO:0005515	protein binding	molecular_function	0.98225	1	2	15	20303	60459	rna-XM_059878811.1,rna-NM_001111262.2
GO:0044237	cellular metabolic process	biological_process	0.99671	1	2	15	25444	60459	rna-XM_059878811.1,rna-XM_015473118.3
GO:0044238	primary metabolic process	biological_process	0.9973	1	2	15	25966	60459	rna-XM_059878811.1,rna-XM_015473118.3
GO:0071704	organic substance metabolic process	biological_process	0.99794	1	2	15	26694	60459	rna-XM_059878811.1,rna-XM_015473118.3
GO:0008152	metabolic process	biological_process	0.99866	1	2	15	27820	60459	rna-XM_059878811.1,rna-XM_015473118.3
